# Supplementary material
Source: MDPI journal article supplement (https://www.mdpi.com/2227-9040/11/7/407)
Supplement: s1 [file s1]

# Conductivity

offset, ISE5

PLS Cond. (mS/cm) - CALIBRATION R2 = 0.89 CC = 0.94 - CROSSVALIDATION R2 = 0.81 CC = 0.91  
OLS Cond. (mS/cm) - CALIBRATION R2 = 0.88 CC = 0.94 - CROSSVALIDATION R2 = 0.77 CC = 0.89

## OLS Regression Results

```
=====
Dep. Variable:          y      R-squared:          0.885
Model:                  OLS    Adj. R-squared:      0.882
Method:                 Least Squares  F-statistic:    413.9
Date:                  Thu, 06 Jul 2023  Prob (F-statistic): 5.50e-27
Time:                  07:53:57  Log-Likelihood:   -51.356
No. Observations:      56      AIC:             106.7
Df Residuals:          54      BIC:             110.8
Df Model:              1
Covariance Type:       nonrobust
=====
```

|       | coef     | std err | t      | P> t  | [0.025  | 0.975]  |
|-------|----------|---------|--------|-------|---------|---------|
| const | -0.5848  | 0.178   | -3.292 | 0.002 | -0.941  | -0.229  |
| x1    | 118.2750 | 5.814   | 20.344 | 0.000 | 106.619 | 129.931 |

```
=====
Omnibus:                5.251  Durbin-Watson:      0.812
Prob(Omnibus):          0.072  Jarque-Bera (JB):    4.327
Skew:                   -0.516  Prob(JB):            0.115
Kurtosis:               3.889  Cond. No.            70.6
=====
```

## Notes:

[1] Standard Errors assume that the covariance matrix of the errors is correctly specified.

-----  
-----  
-----  
C1- ISE1, ISE5

PLS [C1-] (ppm) - CALIBRATION R2 = 0.86 CC = 0.93 - CROSSVALIDATION R2 = 0.77 CC = 0.88  
OLS [C1-] (ppm) - CALIBRATION R2 = 0.85 CC = 0.92 - CROSSVALIDATION R2 = 0.73 CC = 0.86

OLS Regression Results

```
=====
Dep. Variable:          y      R-squared (uncentered):          0.927
Model:                  OLS    Adj. R-squared (uncentered):      0.924
Method:                 Least Squares    F-statistic:          341.1
Date:                  Thu, 06 Jul 2023    Prob (F-statistic):    2.32e-31
Time:                  07:53:57    Log-Likelihood:       -375.12
No. Observations:      56    AIC:                  754.2
Df Residuals:          54    BIC:                  758.3
Df Model:              2
Covariance Type:       nonrobust
=====
```

```
=====
              coef      std err          t      P>|t|      [0.025      0.975]
-----
x1          -2.45e+04    3211.215     -7.630     0.000    -3.09e+04    -1.81e+04
x2           3.368e+04    1781.655     18.904     0.000     3.01e+04     3.73e+04
=====
```

```
=====
Omnibus:                  1.401    Durbin-Watson:          0.933
Prob(Omnibus):            0.496    Jarque-Bera (JB):        0.686
Skew:                    -0.166    Prob(JB):                0.710
Kurtosis:                 3.428    Cond. No.                4.59
=====
```

Notes:

- [1] R<sup>2</sup> is computed without centering (uncentered) since the model does not contain a constant.  
[2] Standard Errors assume that the covariance matrix of the errors is correctly specified.

-----  
-----  
-----  
NO3- offset, ISE2, ISE6

PLS [NO3-] (ppm) - CALIBRATION R2 = 0.69 CC = 0.83 - CROSSVALIDATION R2 = 0.28 CC = 0.63  
OLS [NO3-] (ppm) - CALIBRATION R2 = 0.67 CC = 0.82 - CROSSVALIDATION R2 = 0.33 CC = 0.66

OLS Regression Results

=====

|                   |                  |                     |          |
|-------------------|------------------|---------------------|----------|
| Dep. Variable:    | y                | R-squared:          | 0.674    |
| Model:            | OLS              | Adj. R-squared:     | 0.662    |
| Method:           | Least Squares    | F-statistic:        | 54.91    |
| Date:             | Thu, 06 Jul 2023 | Prob (F-statistic): | 1.21e-13 |
| Time:             | 07:53:57         | Log-Likelihood:     | -268.13  |
| No. Observations: | 56               | AIC:                | 542.3    |
| Df Residuals:     | 53               | BIC:                | 548.3    |
| Df Model:         | 2                |                     |          |
| Covariance Type:  | nonrobust        |                     |          |

=====

|       | coef       | std err | t      | P> t  | [0.025    | 0.975]   |
|-------|------------|---------|--------|-------|-----------|----------|
| const | -23.6725   | 7.903   | -2.995 | 0.004 | -39.524   | -7.821   |
| x1    | -1610.2816 | 696.117 | -2.313 | 0.025 | -3006.516 | -214.047 |
| x2    | -2284.9903 | 944.133 | -2.420 | 0.019 | -4178.682 | -391.299 |

=====

|                |       |                   |       |
|----------------|-------|-------------------|-------|
| Omnibus:       | 4.249 | Durbin-Watson:    | 0.806 |
| Prob(Omnibus): | 0.120 | Jarque-Bera (JB): | 4.251 |
| Skew:          | 0.217 | Prob(JB):         | 0.119 |
| Kurtosis:      | 4.278 | Cond. No.         | 287.  |

=====

Notes:

[1] Standard Errors assume that the covariance matrix of the errors is correctly specified.

-----  
-----  
-----  
SO42- offset, ISE1, ISE3, ISE5

PLS [SO42-] (ppm) - CALIBRATION R2 = 0.70 CC = 0.83 - CROSSVALIDATION R2 = 0.22 CC = 0.57  
OLS [SO42-] (ppm) - CALIBRATION R2 = 0.71 CC = 0.84 - CROSSVALIDATION R2 = 0.34 CC = 0.64

OLS Regression Results

```
=====
Dep. Variable:          y      R-squared:          0.711
Model:                  OLS    Adj. R-squared:      0.694
Method:                 Least Squares  F-statistic:    42.60
Date:                  Thu, 06 Jul 2023  Prob (F-statistic): 4.86e-14
Time:                  07:53:57  Log-Likelihood:   -395.39
No. Observations:      56      AIC:              798.8
Df Residuals:          52      BIC:              806.9
Df Model:              3
Covariance Type:       nonrobust
=====
```

|       | coef       | std err  | t      | P> t  | [0.025    | 0.975]    |
|-------|------------|----------|--------|-------|-----------|-----------|
| const | -462.5752  | 123.452  | -3.747 | 0.000 | -710.300  | -214.851  |
| x1    | 2.231e+04  | 6463.228 | 3.452  | 0.001 | 9341.029  | 3.53e+04  |
| x2    | -2.855e+04 | 1.02e+04 | -2.791 | 0.007 | -4.91e+04 | -8022.004 |
| x3    | 5.272e+04  | 9996.868 | 5.273  | 0.000 | 3.27e+04  | 7.28e+04  |

```
=====
Omnibus:                0.580    Durbin-Watson:          0.889
Prob(Omnibus):          0.748    Jarque-Bera (JB):        0.563
Skew:                   0.227    Prob(JB):                0.755
Kurtosis:               2.812    Cond. No.:               362.
=====
```

Notes:

[1] Standard Errors assume that the covariance matrix of the errors is correctly specified.

-----  
-----  
-----  
HCO3- ISE1

PLS [HCO3-] (ppm) - CALIBRATION R2 = 0.15 CC = 0.38 - CROSSVALIDATION R2 =-0.27 CC =-0.03  
OLS [HCO3-] (ppm) - CALIBRATION R2 =-0.15 CC = 0.14 - CROSSVALIDATION R2 =-0.32 CC = 0.01

OLS Regression Results

=====

|                   |                  |                              |          |
|-------------------|------------------|------------------------------|----------|
| Dep. Variable:    | y                | R-squared (uncentered):      | 0.636    |
| Model:            | OLS              | Adj. R-squared (uncentered): | 0.629    |
| Method:           | Least Squares    | F-statistic:                 | 95.90    |
| Date:             | Thu, 06 Jul 2023 | Prob (F-statistic):          | 1.17e-13 |
| Time:             | 07:53:57         | Log-Likelihood:              | -386.82  |
| No. Observations: | 56               | AIC:                         | 775.6    |
| Df Residuals:     | 55               | BIC:                         | 777.7    |
| Df Model:         | 1                |                              |          |
| Covariance Type:  | nonrobust        |                              |          |

=====

|    | coef      | std err  | t     | P> t  | [0.025  | 0.975]   |
|----|-----------|----------|-------|-------|---------|----------|
| x1 | 1.884e+04 | 1923.597 | 9.793 | 0.000 | 1.5e+04 | 2.27e+04 |

=====

|                |       |                   |       |
|----------------|-------|-------------------|-------|
| Omnibus:       | 1.161 | Durbin-Watson:    | 0.603 |
| Prob(Omnibus): | 0.560 | Jarque-Bera (JB): | 0.484 |
| Skew:          | 0.059 | Prob(JB):         | 0.785 |
| Kurtosis:      | 3.440 | Cond. No.         | 1.00  |

=====

Notes:

- [1] R<sup>2</sup> is computed without centering (uncentered) since the model does not contain a constant.  
[2] Standard Errors assume that the covariance matrix of the errors is correctly specified.

-----  
-----  
-----  
Ca2+ offset, ISE1, ISE3, ISE5

PLS [Ca2+] (ppm) - CALIBRATION R2 = 0.74 CC = 0.86 - CROSSVALIDATION R2 = 0.24 CC = 0.58  
OLS [Ca2+] (ppm) - CALIBRATION R2 = 0.77 CC = 0.88 - CROSSVALIDATION R2 = 0.51 CC = 0.73

OLS Regression Results

=====

|                   |                  |                     |          |
|-------------------|------------------|---------------------|----------|
| Dep. Variable:    | y                | R-squared:          | 0.771    |
| Model:            | OLS              | Adj. R-squared:     | 0.758    |
| Method:           | Least Squares    | F-statistic:        | 58.44    |
| Date:             | Thu, 06 Jul 2023 | Prob (F-statistic): | 1.14e-16 |
| Time:             | 07:53:57         | Log-Likelihood:     | -320.43  |
| No. Observations: | 56               | AIC:                | 648.9    |
| Df Residuals:     | 52               | BIC:                | 657.0    |
| Df Model:         | 3                |                     |          |
| Covariance Type:  | nonrobust        |                     |          |

=====

|       | coef       | std err  | t      | P> t  | [0.025    | 0.975]    |
|-------|------------|----------|--------|-------|-----------|-----------|
| const | -156.8045  | 32.373   | -4.844 | 0.000 | -221.765  | -91.844   |
| x1    | 8436.1321  | 1694.851 | 4.978  | 0.000 | 5035.165  | 1.18e+04  |
| x2    | -1.427e+04 | 2682.768 | -5.318 | 0.000 | -1.96e+04 | -8882.416 |
| x3    | 2.036e+04  | 2621.476 | 7.768  | 0.000 | 1.51e+04  | 2.56e+04  |

=====

|                |        |                   |          |
|----------------|--------|-------------------|----------|
| Omnibus:       | 13.014 | Durbin-Watson:    | 1.224    |
| Prob(Omnibus): | 0.001  | Jarque-Bera (JB): | 14.618   |
| Skew:          | 0.963  | Prob(JB):         | 0.000669 |
| Kurtosis:      | 4.599  | Cond. No.         | 362.     |

=====

Notes:

[1] Standard Errors assume that the covariance matrix of the errors is correctly specified.

-----  
-----  
-----  
K+ offset, ISE3

PLS [K+] (ppm) - CALIBRATION R2 = 0.70 CC = 0.83 - CROSSVALIDATION R2 = 0.49 CC = 0.72  
OLS [K+] (ppm) - CALIBRATION R2 = 0.67 CC = 0.82 - CROSSVALIDATION R2 = 0.49 CC = 0.73

OLS Regression Results

=====

|                   |                  |                     |          |
|-------------------|------------------|---------------------|----------|
| Dep. Variable:    | y                | R-squared:          | 0.674    |
| Model:            | OLS              | Adj. R-squared:     | 0.668    |
| Method:           | Least Squares    | F-statistic:        | 111.6    |
| Date:             | Thu, 06 Jul 2023 | Prob (F-statistic): | 9.40e-15 |
| Time:             | 07:53:57         | Log-Likelihood:     | -146.72  |
| No. Observations: | 56               | AIC:                | 297.4    |
| Df Residuals:     | 54               | BIC:                | 301.5    |
| Df Model:         | 1                |                     |          |
| Covariance Type:  | nonrobust        |                     |          |

=====

|       | coef     | std err | t      | P> t  | [0.025  | 0.975]  |
|-------|----------|---------|--------|-------|---------|---------|
| const | 2.1330   | 0.835   | 2.554  | 0.014 | 0.459   | 3.808   |
| x1    | 345.4761 | 32.698  | 10.566 | 0.000 | 279.921 | 411.031 |

=====

|                |       |                   |        |
|----------------|-------|-------------------|--------|
| Omnibus:       | 6.632 | Durbin-Watson:    | 0.615  |
| Prob(Omnibus): | 0.036 | Jarque-Bera (JB): | 6.001  |
| Skew:          | 0.724 | Prob(JB):         | 0.0498 |
| Kurtosis:      | 2.309 | Cond. No.         | 72.3   |

=====

Notes:

[1] Standard Errors assume that the covariance matrix of the errors is correctly specified.

Mg2+ ISE5

PLS [Mg2+] (ppm) - CALIBRATION R2 = 0.77 CC = 0.88 - CROSSVALIDATION R2 = 0.64 CC = 0.81  
OLS [Mg2+] (ppm) - CALIBRATION R2 = 0.76 CC = 0.87 - CROSSVALIDATION R2 = 0.63 CC = 0.80

#### OLS Regression Results

```
=====
Dep. Variable:          y      R-squared (uncentered):          0.928
Model:                  OLS    Adj. R-squared (uncentered):      0.927
Method:                 Least Squares    F-statistic:          707.6
Date:                  Thu, 06 Jul 2023    Prob (F-statistic):      4.39e-33
Time:                  07:53:57    Log-Likelihood:         -281.82
No. Observations:      56    AIC:                    565.6
Df Residuals:          55    BIC:                    567.7
Df Model:              1
Covariance Type:       nonrobust
=====
```

|    | coef      | std err | t      | P> t  | [0.025   | 0.975]   |
|----|-----------|---------|--------|-------|----------|----------|
| x1 | 4354.0487 | 163.682 | 26.601 | 0.000 | 4026.022 | 4682.075 |

```
=====
Omnibus:                5.878    Durbin-Watson:          0.676
Prob(Omnibus):          0.053    Jarque-Bera (JB):        2.394
Skew:                   0.134    Prob(JB):                0.302
Kurtosis:               2.023    Cond. No.:               1.00
=====
```

#### Notes:

- [1] R<sup>2</sup> is computed without centering (uncentered) since the model does not contain a constant.  
[2] Standard Errors assume that the covariance matrix of the errors is correctly specified.



-----  
-----  
-----  
Na+ ISE1, ISE3

PLS [Na+] (ppm) - CALIBRATION R2 = 0.86 CC = 0.93 - CROSSVALIDATION R2 = 0.76 CC = 0.88  
OLS [Na+] (ppm) - CALIBRATION R2 = 0.82 CC = 0.91 - CROSSVALIDATION R2 = 0.73 CC = 0.87

OLS Regression Results

```
=====
Dep. Variable:          y      R-squared (uncentered):          0.933
Model:                  OLS    Adj. R-squared (uncentered):      0.930
Method:                 Least Squares    F-statistic:          374.3
Date:                  Thu, 06 Jul 2023    Prob (F-statistic):      2.25e-32
Time:                  07:53:57    Log-Likelihood:         -338.05
No. Observations:      56    AIC:                    680.1
Df Residuals:          54    BIC:                    684.2
Df Model:              2
Covariance Type:       nonrobust
=====
              coef      std err          t      P>|t|      [0.025      0.975]
-----
x1          -3651.8894    1484.540      -2.460      0.017    -6628.213    -675.566
x2           1.673e+04     985.470     16.977      0.000     1.48e+04     1.87e+04
=====
Omnibus:                2.030    Durbin-Watson:          0.858
Prob(Omnibus):          0.362    Jarque-Bera (JB):        1.387
Skew:                   0.373    Prob(JB):                0.500
Kurtosis:               3.196    Cond. No.:               3.69
=====
```

Notes:

- [1] R<sup>2</sup> is computed without centering (uncentered) since the model does not contain a constant.  
[2] Standard Errors assume that the covariance matrix of the errors is correctly specified.
